# Supplementary material
Source: PubMed Central journal article supplement (PMC2883338)
Supplement: ddq136_1.pdf [file ddq136_1.pdf]

## SUPPLEMENTARY MATERIAL

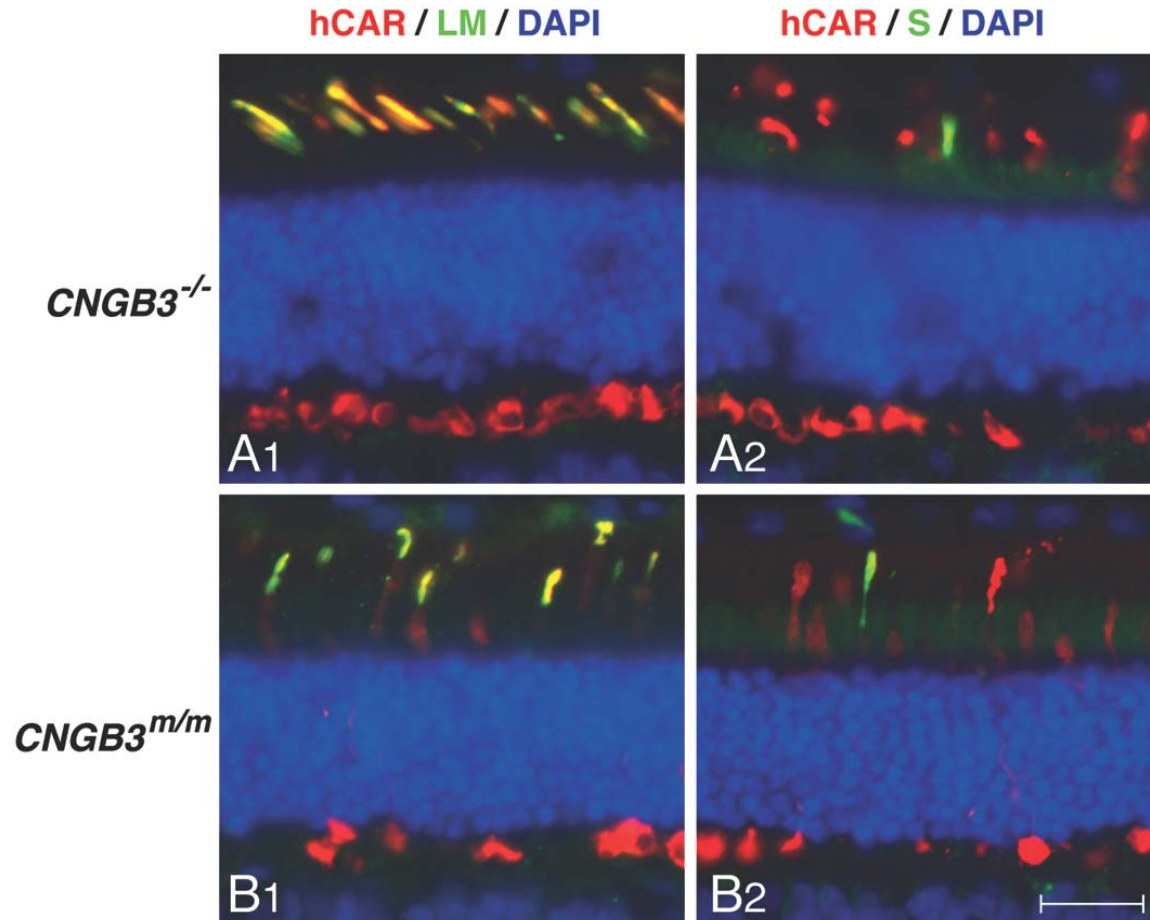

**Figure S1.** Cones are still present in older *CNGB3*-mutant canine retinas at several years of age. Shown are cones in a 1.1-year old *CNGB3*<sup>-/-</sup> (A1, A2) and a 1.6-year old *CNGB3*<sup>m/m</sup> dog (B1, B2). The cone outer segments are not as numerous and their morphology appears more irregular than in the younger *CNGB3*-mutant retinas shown in Figure 2. Calibration bar = 20  $\mu$ m.

**Table S1.** Primers and probes for qRT-PCR and exon junction crossed by PCR product.

| <b>Gene</b>      | <b>Forward Primer</b>        | <b>MGB Probe</b>     | <b>Reverse Primer</b>    | <b>Exon Junction</b> |
|------------------|------------------------------|----------------------|--------------------------|----------------------|
| <i>hCNGB3</i>    | AAGAAGGCTCTCACCCAAGTAATC     | TCAGCAAACCACAGCAC    | GTGTGGCTCTTCAGACGTGACT   | 1-2                  |
| <i>cCNGA3</i>    | GCCCTGCCTGTCTTCTATAACTG      | TGTGCAGGGCCTGTT      | CACAGCATCACGTGCTCAGA     | 5-6                  |
| <i>cCNGB3</i>    | AAGATCCTGATCCAAGCAATCAG      | CTCAGCAATCTACAAGACA  | CTTCAAACGTGACTGGAGTCATCT | 1-2                  |
| <i>L/M opsin</i> | CAGCGTCATCATACTGTGCTACCT     | ATCCGAGCGGTGGC       | GGACTCAGATTCTTTCTGCTGCTT | 4-5                  |
| <i>S opsin</i>   | CGCCATGTTTGTGCTTTGG          | CTCTACAGCAGGTCTGGTGA | GATGACAATGTAGCGCTCAAAGG  | 1-2                  |
| <i>Rod opsin</i> | ATGATTGT CATATTCTTCTGCTATGGA | CAGTCAAGGAGGCAGCT    | TGGGTGGTGGCCGATTC        | 3-4                  |

**Movie S1.** Behavioral visual performance of an untreated and treated achromatopsia affected dog under photopic conditions (sunny day).

- Part 1: Achromatopsia affected dog (*CNGB3<sup>m/m</sup>*) – untreated.
- Part 2: Achromatopsia affected dog (*CNGB3<sup>m/m</sup>*) – treated (GS80; see Table 1).

Two *CNGB3<sup>m/m</sup>* mutant littermates are shown outside during a sunny summer day. The brown dog is untreated and shows the essential features of achromatopsia under photopic conditions, including disorientation, hypermetric gait, and collision with obstacles. The brown-grey, treated dog (grey-brown) acts visual with a normal gait; he is avoiding obstacles and finds toys based on visual cues.

Reproduced courtesy of the National Eye Institute (NEI) / National Institutes of Health (NIH).

**Movie S2.** Behavioral visual performance of a normal control dog, as well as an untreated and treated achromatopsia affected dog in the obstacle avoidance course.

- Part 1: Normal control dog.
- Part 2: Achromatopsia affected dog (*CNGB3<sup>-/-</sup>*) – untreated.
- Part 3: Achromatopsia affected dog (*CNGB3<sup>-/-</sup>*) – treated (M626; see Table 1).

The movies show a normal control dog as well as an untreated and a treated *CNGB3*-mutant dog
